# Supplementary material
Source: PubMed Central journal article supplement (PMC7833783)

# THE LANCET

## Infectious Diseases

### **Supplementary appendix**

This appendix formed part of the original submission and has been peer reviewed. We post it as supplied by the authors.

Supplement to: Lee J, Kim SY, Sung J, et al. Challenges and issues of SARS-CoV-2 pool testing. *Lancet Infect Dis* 2020; published online July 14. [https://doi.org/10.1016/S1473-3099\(20\)30516-8](https://doi.org/10.1016/S1473-3099(20)30516-8).

Figure 1. Threshold cycles (Ct) values of RdRp gene of pooled samples according to in serial pooling size. (N=50) The dots of the same color show the result of positive samples in different pool sizes. Each pool consisted of a single positive clinical sample and various negative clinical samples.

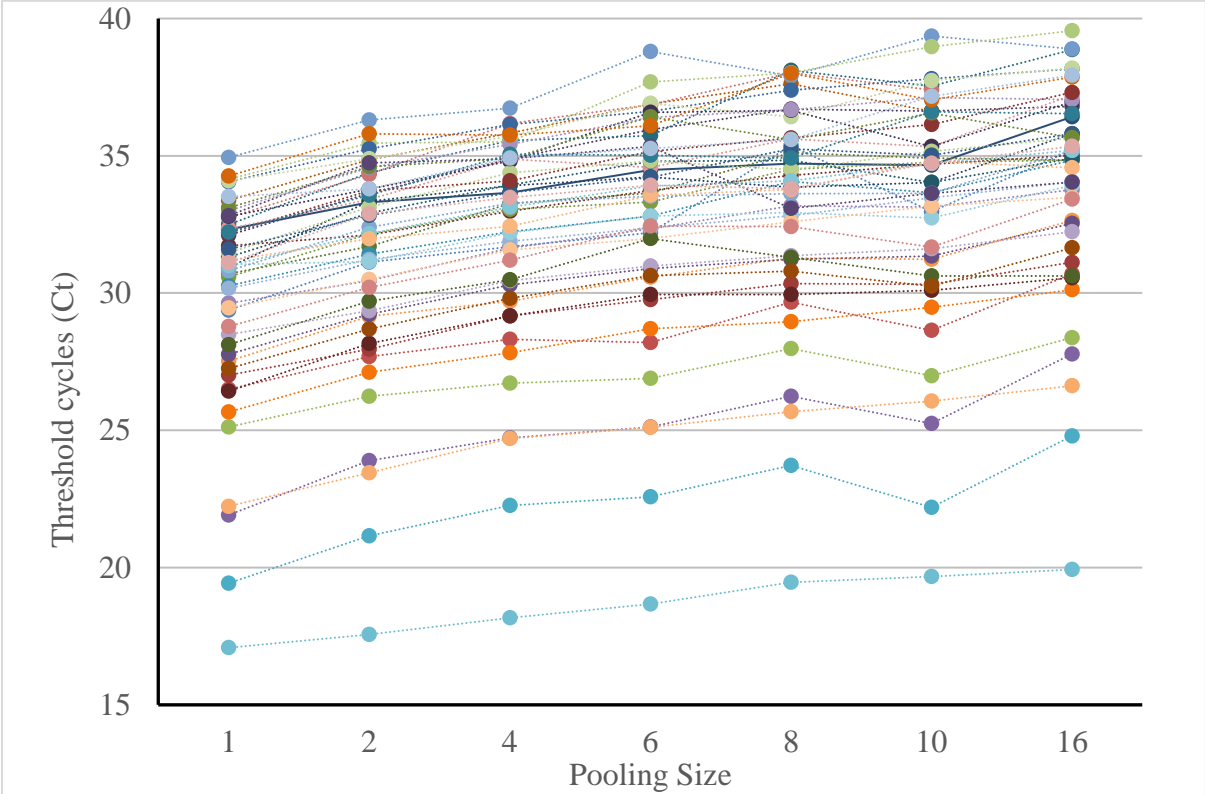

Supplement: mmc1.pdf [file mmc1.pdf]
